# Supplementary material for: Nutrient Transporter Expression in the Jejunum in Relation to Body Mass Index in Patients Undergoing Bariatric Surgery
Source: PubMed Central journal article supplement (PMC5133071; doi:10.3390/nu8110683), 2016-10-29
Supplement: nutrients-08-00683-s001.pdf [file nutrients-08-00683-s001.pdf]

## Supplementary Materials: Nutrient Transporter Expression in the Jejunum in Relation to Body Mass Index in Patients Undergoing Bariatric Surgery

Brian A. Irving, G. Craig Wood, Peter N. Bennotti, Ellappan Babu, Abhishek Deshpande, Michelle R. Lent, Anthony Petrick, Jon Gabrielsen, William Strodel, Glenn S. Gerhard, Christopher D. Still, Vadivel Ganapathy and David D. K. Rolston

Table S1. Primer sequences used for Real-Time Quantitative RT-PCR.

| Protein Name       | Gene Name | Orientation | Sequence                  |
|--------------------|-----------|-------------|---------------------------|
| GLUT2              | SLC2A2    | forward     | GTGGGTGGCTTGGGGACACAC     |
| GLUT2              | SLC2A2    | reverse     | CCAGGCCTGAAATTAGCCCACAA   |
| SGLT1              | SLC5A1    | forward     | CCAAGACCACCGCGGTCACCC     |
| SGLT1              | SLC5A1    | reverse     | GAGGCTCCAATCGGCCACCAC     |
| SMCT1              | SLC5A8    | forward     | CGTCTCTGTGGAACAGTCCT      |
| SMCT1              | SLC5A8    | reverse     | TAAGACCACCCAGTGTGCAG      |
| SMCT2              | SLC5A12   | forward     | GGAGGTGTTGTGCAGGCTTCCC    |
| SMCT2              | SLC5A12   | reverse     | GGCCCAATGGCCACCCAAA       |
| TauT               | SLC6A6    | forward     | CTTCTCTTGCTTGGACTGGATAG   |
| TauT               | SLC6A6    | reverse     | CTACACACGAAGGCGATGAA      |
| ATB <sup>0,+</sup> | SLC6A14   | forward     | GCAGCTTCCCAGTGAACAAT      |
| ATB <sup>0,+</sup> | SLC6A14   | reverse     | ATATACCACCTTGCCAGACG      |
| B <sup>0</sup> AT1 | SLC6A19   | forward     | TCCATCCACCCGGCCCTGAAG     |
| B <sup>0</sup> AT1 | SLC6A19   | reverse     | ACTCGTCCACATAACCCTGTCTGGT |
| SNAT2              | SLC38A2   | forward     | TGGGCAGTGAATCCTTGGGC      |
| SNAT2              | SLC38A2   | reverse     | AAAGACCTCCTTCATTGGCAGTCT  |
| LAT1               | SLC7A5    | forward     | CCGTGCCGTCCCTCGTGTC       |
| LAT1               | SLC7A5    | reverse     | GGTTCACCTTGATGGGCCGCT     |
| LAT2               | SLC7A8    | forward     | TCGGCTCCTGGCTGCCATCT      |
| LAT2               | SLC7A8    | reverse     | CCAGCCAGAAGTACTCTCCTTTGC  |
| xCT                | SLC7A11   | forward     | TGGACGGTGTGTGGGGTCCT      |
| xCT                | SLC7A11   | reverse     | CAGCAGTAGCTGCAGGGCGTA     |
| CAT-1              | SLC7A1    | forward     | CTCGGGTGCCGTTGCTGCTGT     |
| CAT-1              | SLC7A1    | reverse     | CAGGTTAGGCTGCTCTGGCTGG    |
| EAAT3,EAAC1        | SLC1A1    | forward     | CCGCGGTGGTGCTAGGCATT      |
| EAAT3,EAAC1        | SLC1A1    | reverse     | ACGTTGGAATCCAGTGCAGCAA    |
| ASCT2, AAAT        | SLC1A5    | forward     | GCCATCAACGCCTCCGTGGGA     |
| ASCT2, AAAT        | SLC1A5    | reverse     | ACGGGCACCTTCACCCTGGTTC    |
| 18S                |           | forward     | CCCGTTGAACCCCATTCGT       |
| 18S                |           | reverse     | GCCTACTAAACCATCCAATCGGTA  |
